# Supplementary material
Source: Springer Nature journal article supplement (https://www.springermedizin.de/resource/supplementary/12939_2012_291_MOESM1_ESM.pdf/9550776)

Honduras

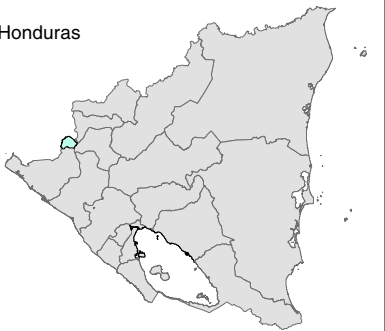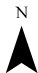

-  Health center
-  Health post
-  Main road

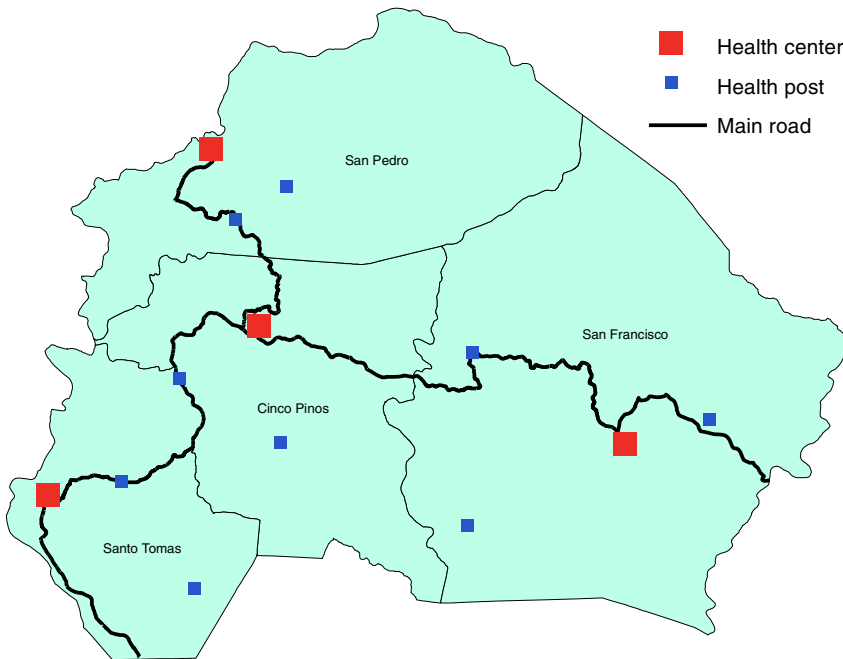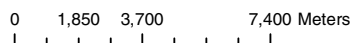

Supplement: MOESM1 [file 9550776]
